# Supplementary material
Source: PubMed Central journal article supplement (PMC5568472)

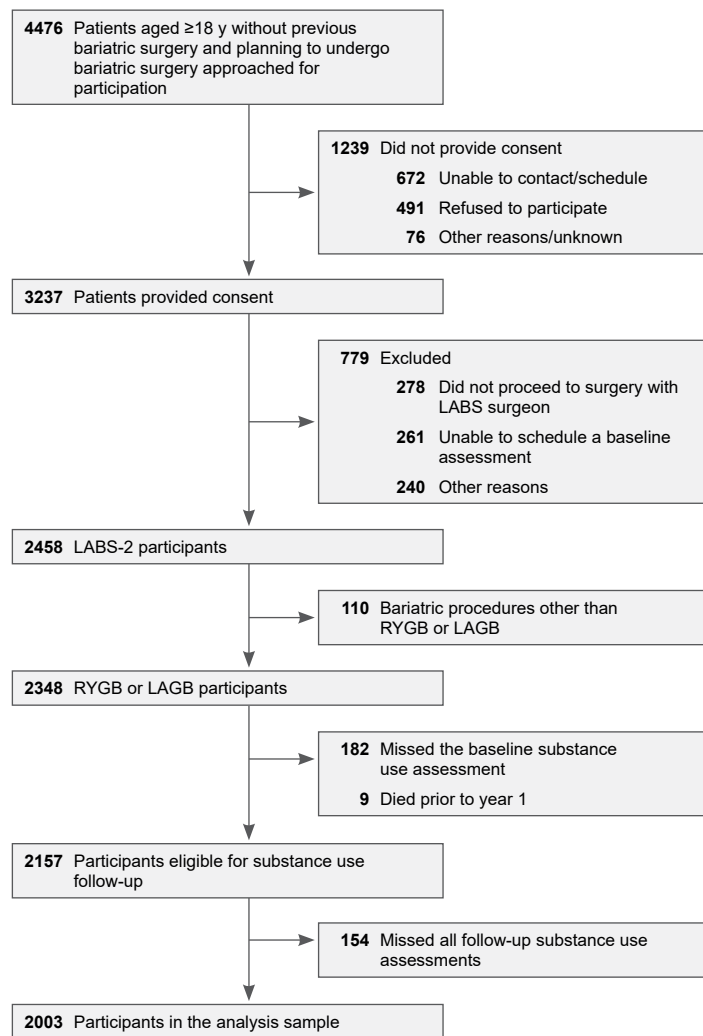

Supplement: NIHMS878130-supplement-2.pdf [file NIHMS878130-supplement-2.pdf]
